# Supplementary material for: Supramolecular cations of (m-halogenated-anilinium)(dibenzo[18]crown-6) in Keggin [SMo12O402−] polyoxometallates
Source: Royal Society of Chemistry journal article supplement (doi:10.1039/c4ce01988a), 2014-12-04
Supplement: c4ce01988a1.pdf [file c4ce01988a1.pdf]

**Supramolecular Cations of *m*-halogenated-anilinium(Dibenzo[18]crown-6) in Keggin [SMo<sub>12</sub>O<sub>40</sub>]<sup>2-</sup> Polyoxometallates**

<sup>a</sup>Graduate School of Environmental Science, Hokkaido University, N10W5, Kita-ku Sapporo, Hokkaido 060-0810 JAPAN. <sup>b</sup>Research Institute for Electronic Science, Hokkaido University, N20W10, Kita-ku Sapporo 001-0020 JAPAN.

**Supporting Information**

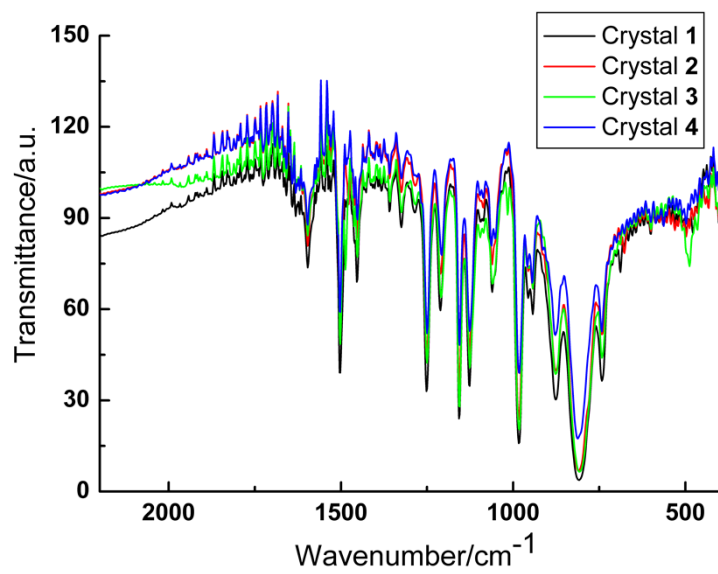

Fig. S1. The IR spectrum of crystal 1, 2, 3 and 4.

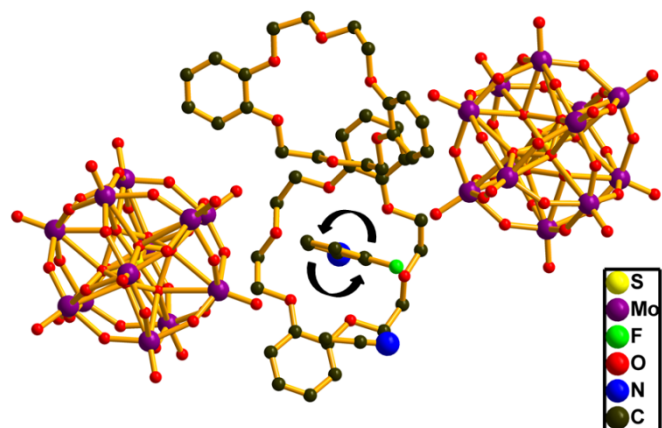

Fig. S2. Initial model structure for the potential energy calculations of crystal **1**, hydrogen atoms are omitted for clarity.

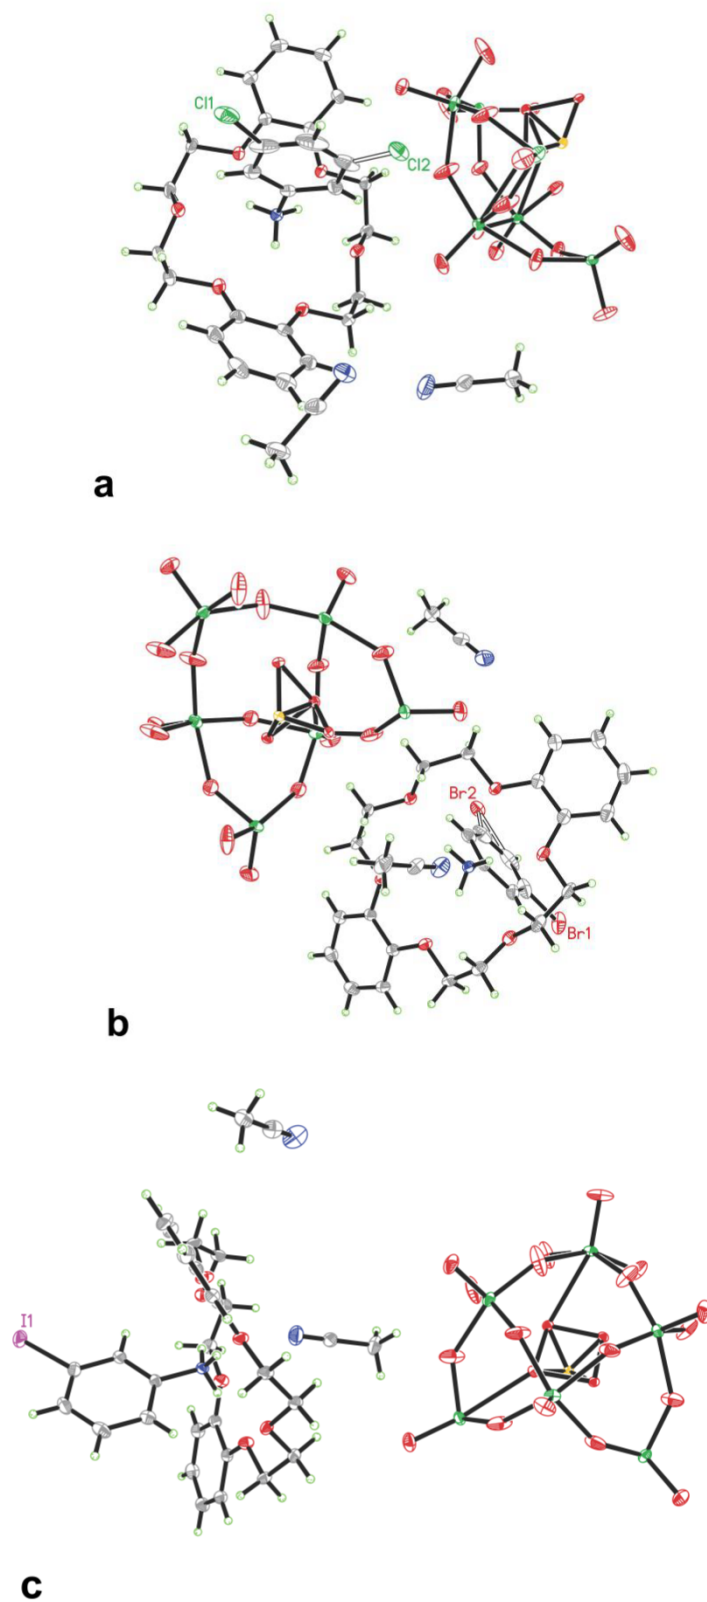

Fig. S3. ORTEP diagram of the asymmetric unit of crystals **2** (a), **3** (b) and **4** (c) with the atomic numbering scheme and 30% thermal ellipsoids

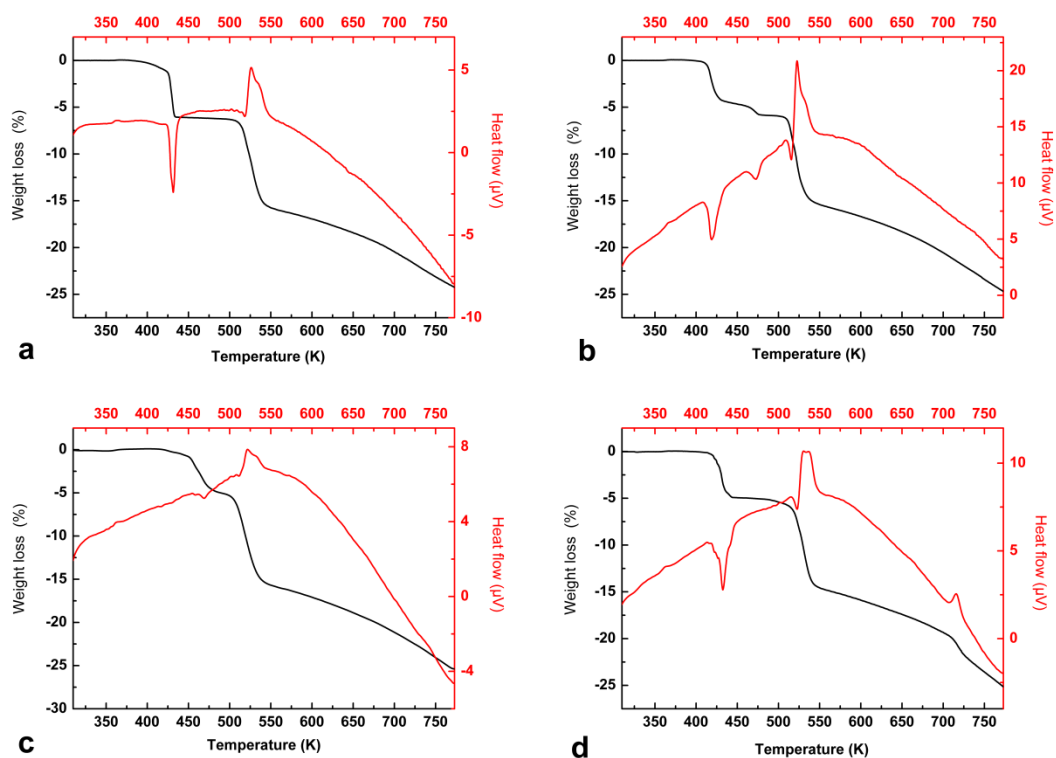

Fig. S4. The TG-DTA curve of compound **1** (a), **2** (b), **3** (c) and **4** (d).

Thermal analysis was performed using a  $\text{Al}_2\text{O}_3$  reference in the temperature range from 303 to 773 K with a heating rate of  $10 \text{ K min}^{-1}$  under nitrogen atmospheric. Through the thermo-gravimetry measurement, this four compounds started to decompose at 423 K, and the existence of four  $\text{CH}_3\text{CN}$  in the compounds were lost at 433 K (**1**), 476 K (**2**), 500 K (**3**) and 493 K (**4**), which was confirmed by the weight loss of 5.9%, 5.7%, 5.3% and 5.1% respectively.

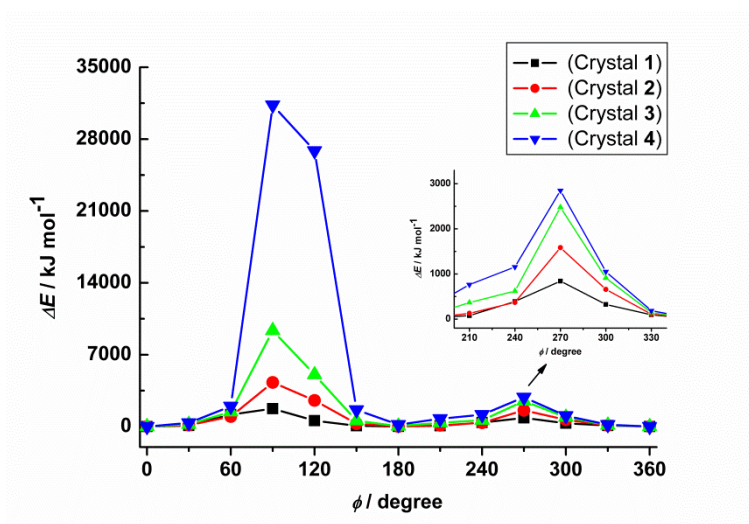

Fig. S5. Potential energy of (*m*-XAni<sup>+</sup>) cations around the N(1)–C(21) bond. Relative energy ( $\Delta E$ ) vs. the rotation angle ( $\phi$ ) of crystal **1** (black line), **2** (red line), **3** (green line) and **4** (blue line).

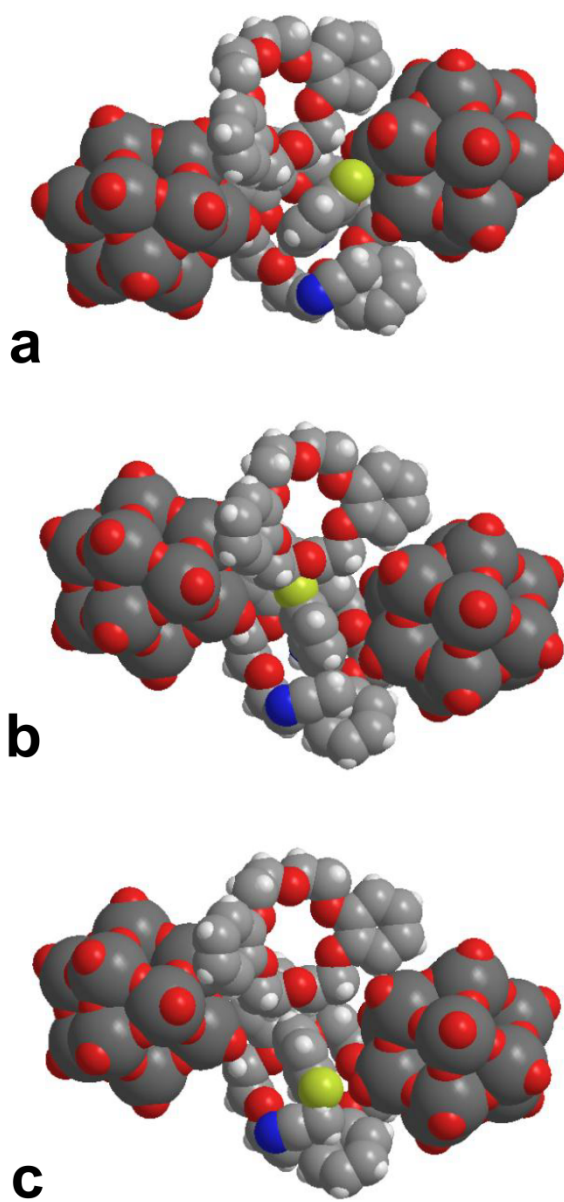

Fig. S6. The model structure of crystal **1** when the (*m*-FAni<sup>+</sup>) cations around the N(1)-C(21) bond rotating 0° (a), 90° (b) and 270° (c).

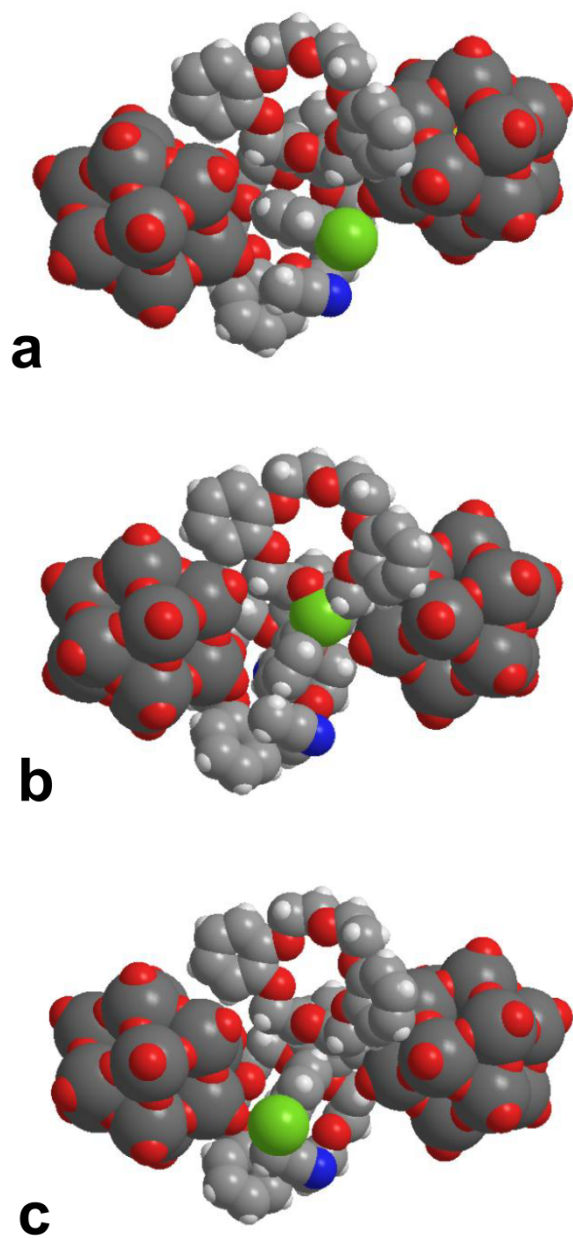

Fig. S7. The model structure of crystal **2** when the ( $m\text{-ClAni}^+$ ) cations around the N(1)-C(21) bond rotating  $0^\circ$  (a),  $90^\circ$  (b) and  $270^\circ$  (c).



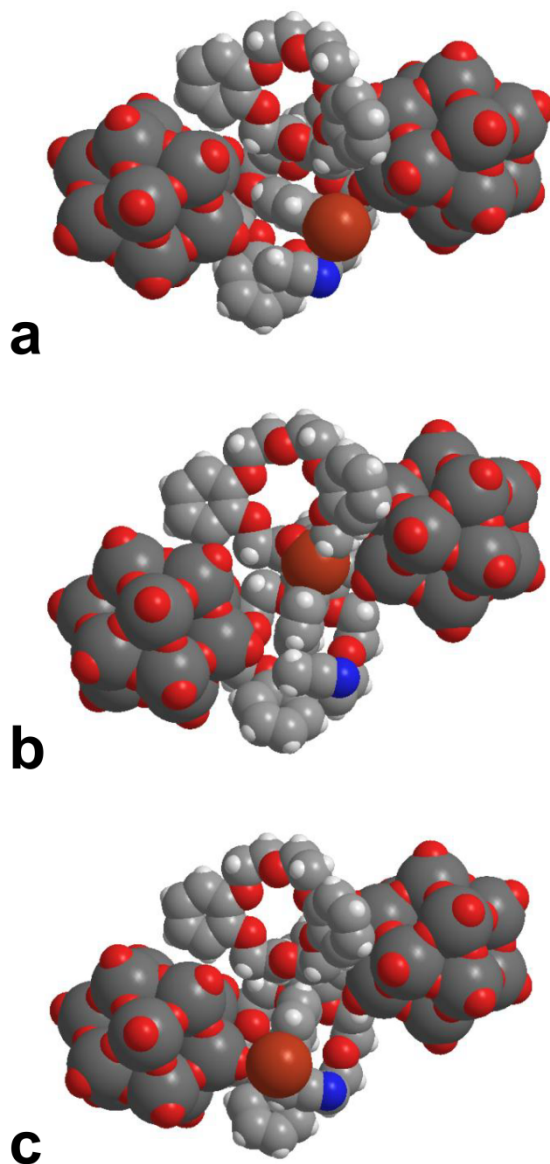

Fig. S8. The model structure of crystal **3** when the (*m*-BrAni<sup>+</sup>) cations around the N(1)–C(21) bond rotating 0° (a), 90° (b) and 270° (c).

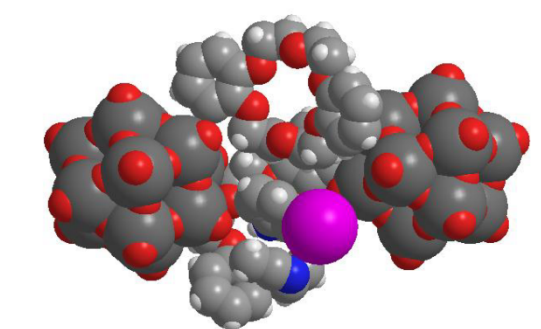

**a**

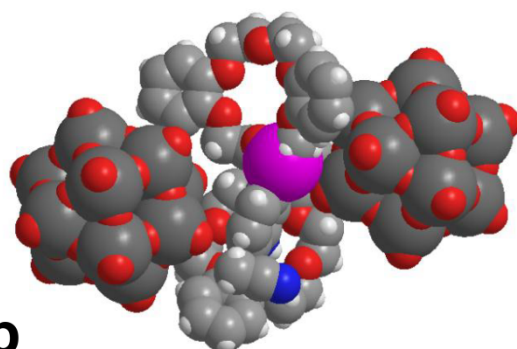

**b**

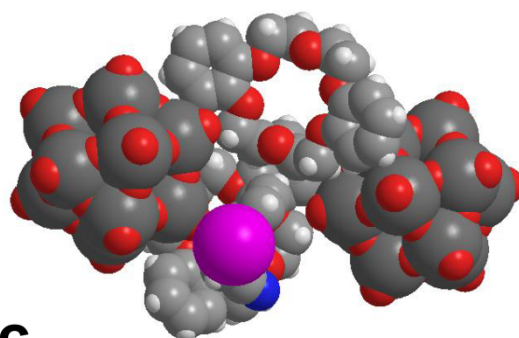

**c**

Fig. S9. The model structure of crystal **4** when the (*m*-IAni<sup>+</sup>) cations around the N(1)-C(21) bond rotating 0° (a), 90° (b) and 270° (c).
